# Supplementary material for: Gold nanoparticle-modulated conductivity in gold peapodded silica nanowires
Source: Royal Society of Chemistry journal article supplement (doi:10.1039/c2nr30549f), 2012-01-01
Supplement: c2nr30549f.pdf [file c2nr30549f.pdf]

Supporting Information for

**Gold nanoparticles-modulated conductivity in gold  
peapodded silica nanowire**

Sheng-Bo Wang<sup>a</sup>, Ming-Shien Hu<sup>b</sup>, Shou Jinn Chang<sup>a</sup>, Cheong-Wei Chong<sup>c,d</sup>,  
Hsieh-Cheng Han<sup>e</sup>, Bohr-Ran Huang<sup>f</sup>, Li-Chyong Chen<sup>e</sup>, and Kuei-Hsien  
Chen<sup>b,e\*</sup>

**I-V characteristic for individual Au peapodded silica nanowire**

The I-V characteristic of the various individual Au peapodded silica nanowire device exhibits a typical Ohmic contacts behavior in the vacuum at room temperature as shown in Figure S1.

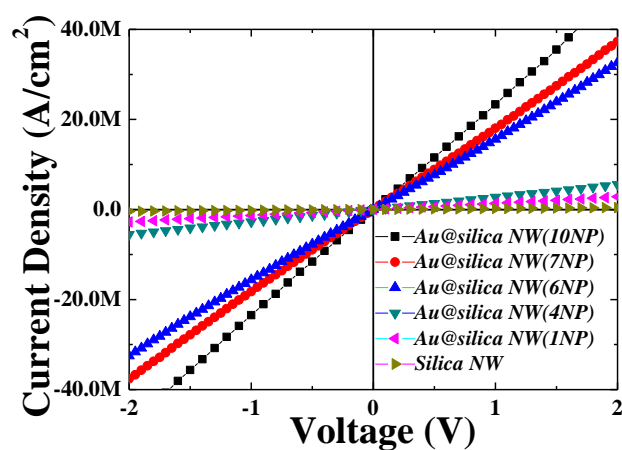

Figure (S1) I-V characteristic for the various individual Au peapodded silica nanowire
